# Supplementary material for: Tobacco Cutworm (Spodoptera Litura) Larvae Silenced in the NADPH-Cytochrome P450 Reductase Gene Show Increased Susceptibility to Phoxim
Source: Int J Mol Sci. 2019 Aug 6;20(15):3839. doi: 10.3390/ijms20153839 (PMC6696589; doi:10.3390/ijms20153839)
Supplement: Supplementary file 1 [file ijms-20-03839-s001.pdf]

## SUPPLEMENTARY INFORMATION

Tobacco cutworm (*Spodoptera litura*) larvae silenced in the NADPH-cytochrome P450 reductase gene show increased susceptibility to phoxim

Hong-Yi Ji, Christian Staehelin, Yan-Ping Jiang, Shi-Wei Liu, Zhi-Hui Ma, Yi-Juan Su, Jia-En Zhang, and Rui-Long Wang

*Int. J. Mol. Sci.* 2019

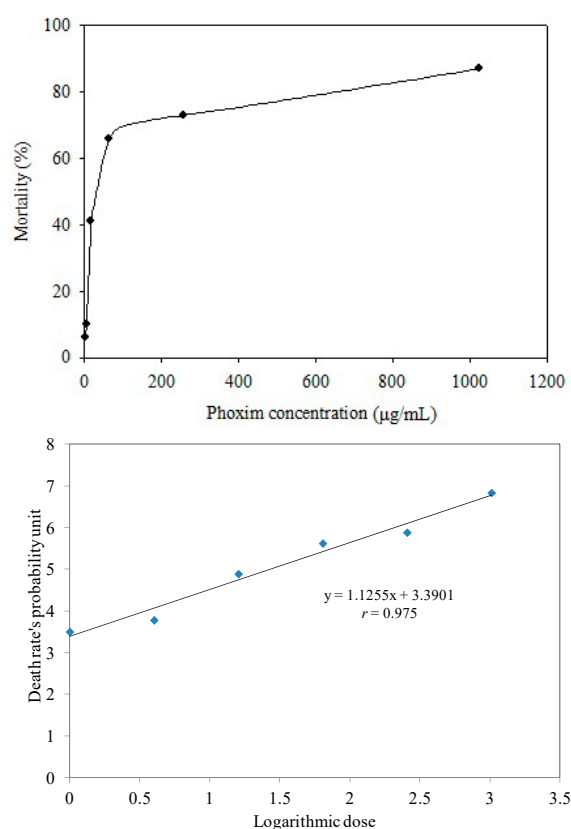

**Supplementary Figure 1:** Determination of  $LC_{15}$  and  $LC_{50}$  values for phoxim. Fifth-instar larvae of *S. litura* were treated with indicated concentrations of phoxim and mortality values were determined 48 hours after the insecticide treatment. The upper panel indicates dose-dependent mortality and the lower panel shows the linear regression equation after logarithmic transformation.
